# Supplementary material for: EGF stimulates human trophoblast cell invasion by downregulating ID3-mediated KISS1 expression
Source: PubMed Central journal article supplement (PMC8499481; doi:10.1186/s12964-021-00783-2), 2021-10-07
Supplement: 12964_2021_783_MOESM3_ESM.pdf [file 12964_2021_783_MOESM3_ESM.pdf]

### A GO analysis of upregulated genes

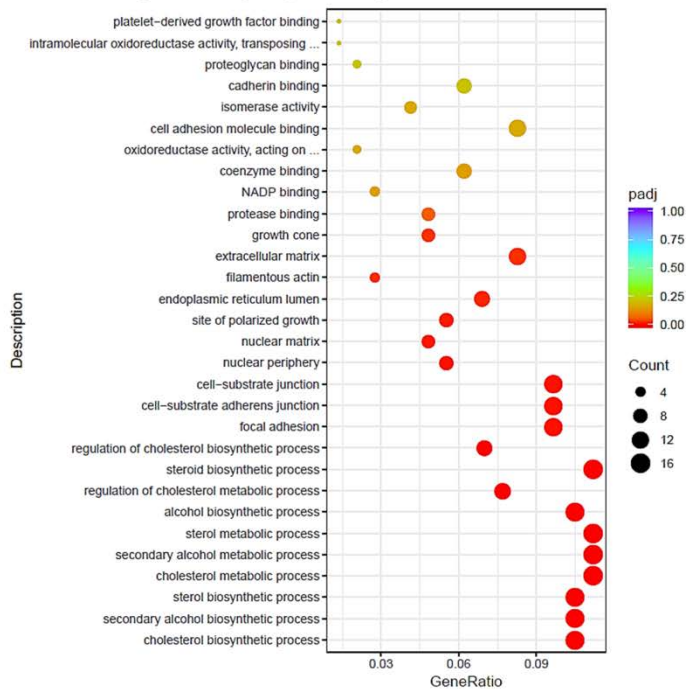

### B GO analysis of downregulated genes

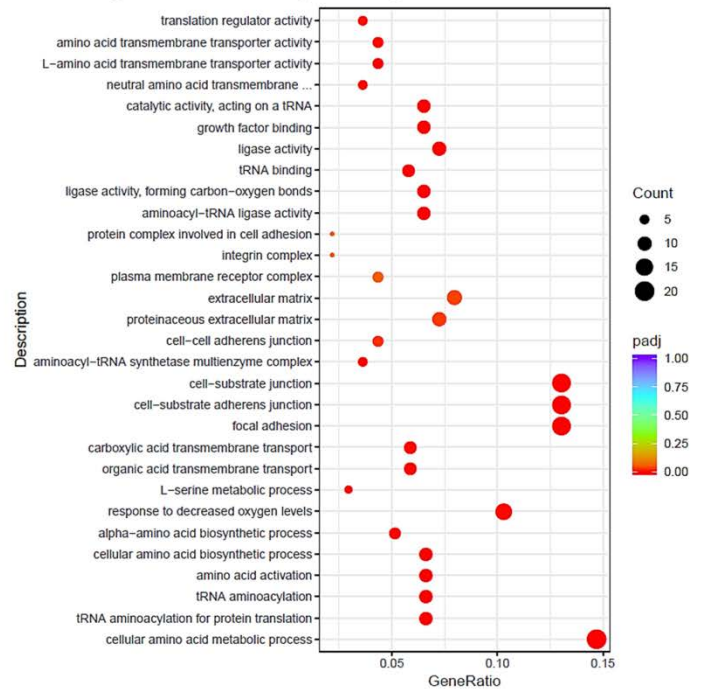

### C DO analysis of upregulated genes

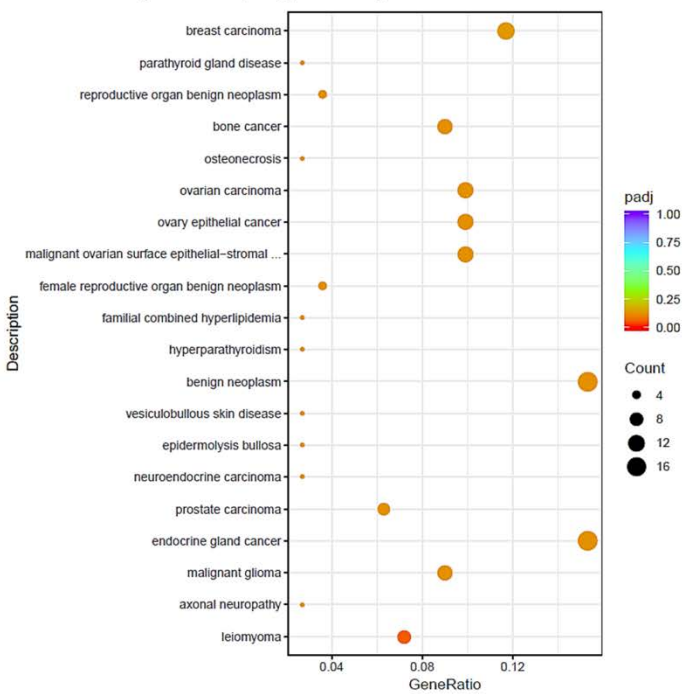

### D DO analysis of downregulated genes

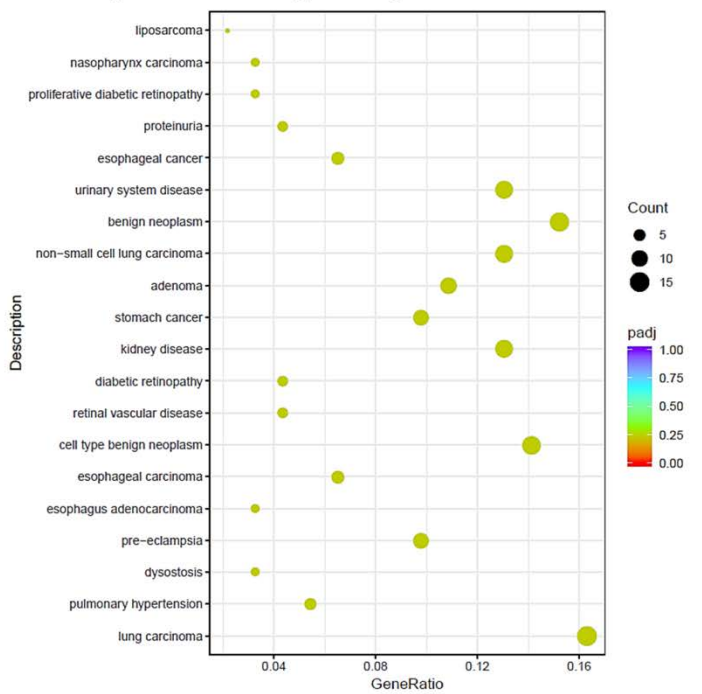

Additional file 2: Figure S1. Gene Ontology (GO) and Disease Ontology (DO) analysis of DEGs.
