# Supplementary material for: EGF stimulates human trophoblast cell invasion by downregulating ID3-mediated KISS1 expression
Source: PubMed Central journal article supplement (PMC8499481; doi:10.1186/s12964-021-00783-2), 2021-10-07
Supplement: 12964_2021_783_MOESM4_ESM.pdf [file 12964_2021_783_MOESM4_ESM.pdf]

### A KEGG pathways enriched by upregulated genes

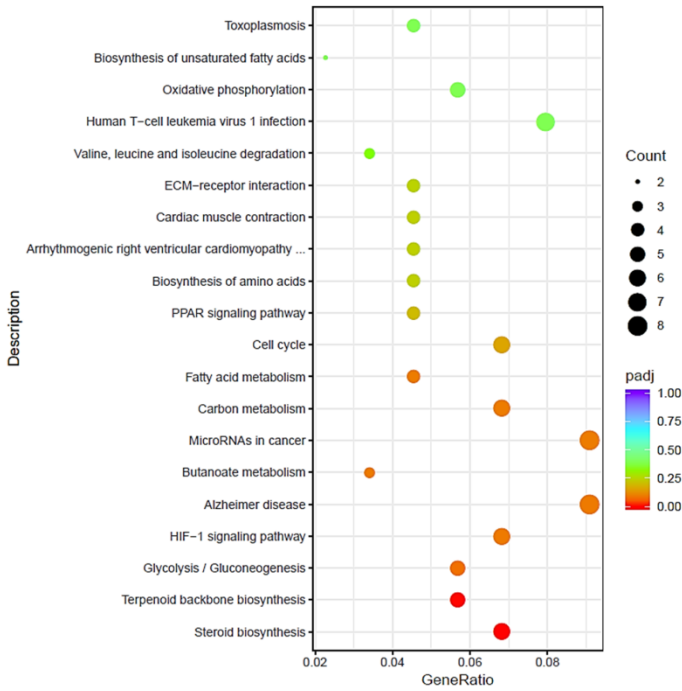

### B KEGG pathway enriched by downregulated genes

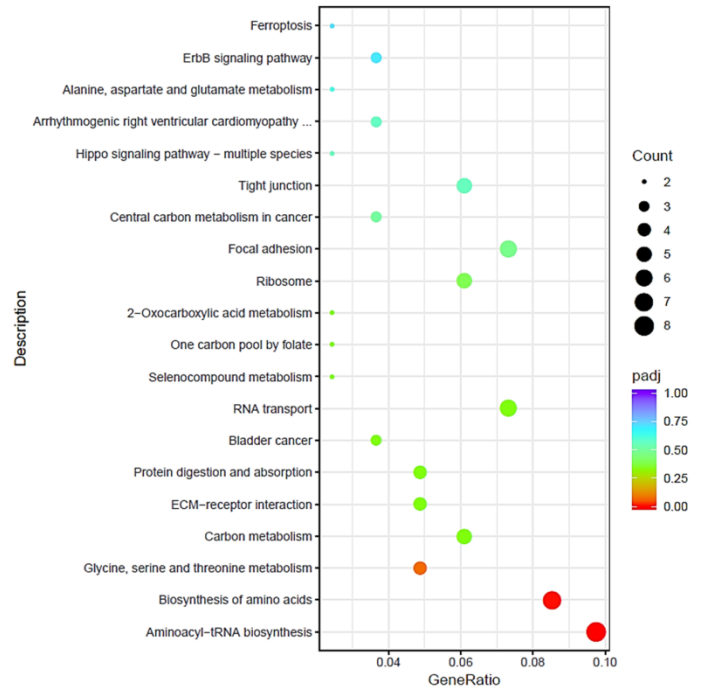

Additional file 3: Figure S2. KEGG signaling pathway analysis of DEGs.
