# Supplementary material for: EGF stimulates human trophoblast cell invasion by downregulating ID3-mediated KISS1 expression
Source: PubMed Central journal article supplement (PMC8499481; doi:10.1186/s12964-021-00783-2), 2021-10-07
Supplement: 12964_2021_783_MOESM5_ESM.pdf [file 12964_2021_783_MOESM5_ESM.pdf]

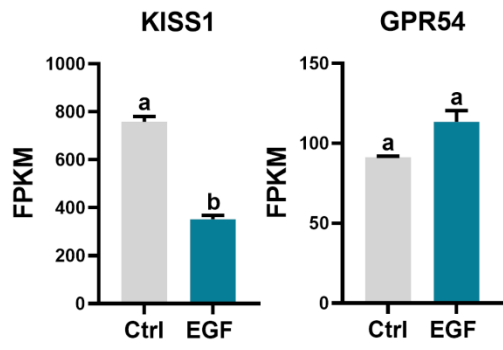

**Additional file 4: Figure S3.** RNA-seq results of KISS1 and GPR54 levels.
