# Supplementary material for: EGF stimulates human trophoblast cell invasion by downregulating ID3-mediated KISS1 expression
Source: PubMed Central journal article supplement (PMC8499481; doi:10.1186/s12964-021-00783-2), 2021-10-07
Supplement: 12964_2021_783_MOESM6_ESM.pdf [file 12964_2021_783_MOESM6_ESM.pdf]

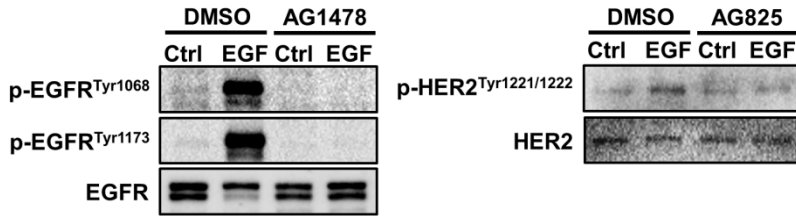

**Additional file 5: Figure S4.** The effect of AG1478 on EGFR activation and the effect of AG825 on HER2 activation. HTR-8/SVneo cells were pretreated with vehicle control (DMSO), 5  $\mu$ M AG1478 (left panel), or 5  $\mu$ M AG825 for 1 h, and then treated with 50 ng/mL EGF for 10 min. EGFR phosphorylation levels at Tyr1068 and Tyr1173, and HER2 phosphorylation levels at Tyr1221/1222 were examined by western blot.
